# Supplementary material
Source: PubMed Central journal article supplement (PMC8377561)
Supplement: jamaoncol-e211693-s002.pdf [file jamaoncol-e211693-s002.pdf]

## Supplementary Online Content

Yanez B, Gray RJ, Sparano JA, et al. Association of modifiable risk factors with early discontinuation of adjuvant endocrine therapy: a post hoc analysis of a randomized clinical trial. *JAMA Oncol*. Published online June 17, 2021.

doi:10.1001/jamaoncol.2021.1693

**eTable 1.** Medical Information in the TAILORx Study

**eTable 2.** Sample Characteristics and Results from Initial Joint Model on Endocrine Therapy Early Discontinuation

**eTable 3.** Endocrine Therapy Early Discontinuation by Medication Status, Adjusted for Age and Chemotherapy

**eFigure 1.** CONSORT Diagram

**eFigure 2.** Kaplan-Meier Curve

This supplementary material has been provided by the authors to give readers additional information about their work.

**eTable 1. Medical Information in the TAILORx Study**

| <b>Comorbidities Collected in the TAILORx Trial</b> | <b>Non-Endocrine Therapy Medications Collected in the TAILORx Trial</b> |
|-----------------------------------------------------|-------------------------------------------------------------------------|
| Antidepressants                                     | Arthritic Conditions                                                    |
| Antihypertensives                                   | Cardiovascular disease                                                  |
| Anxiolytics                                         | Cerebrovascular disease                                                 |
| Bisphosphonates                                     | Depression                                                              |
| COX-2 inhibitors                                    | Diabetes                                                                |
| Diabetes medications                                | Fibromyalgia                                                            |
| Intravaginal Estrogen Preparations                  | Hyperlipidemia                                                          |
| Lipid-lowering agents                               | Hypertension                                                            |
| Non-Prescription Supplements for Memory             | Liver disease                                                           |
| Non-Steroidal Anti-Inflammatory Agents              | Neuropathy                                                              |
| Opioid-containing analgesics                        | Osteoarthritis                                                          |
| Prescription Medications for Relief of Hot Flashes  | Osteoporosis                                                            |
| Prophylactic Antiplatelet Therapy                   | Pulmonary Disease                                                       |

**eTable 2.** Sample Characteristics and Results from Initial Joint Model on Endocrine Therapy Early Discontinuation

| <b>Characteristics</b>   | <b><i>n</i></b> | <b>Hazard Ratio</b> | <b><i>P</i>-value</b> |
|--------------------------|-----------------|---------------------|-----------------------|
| No Chemotherapy          | 567             | reference           |                       |
| Received Chemotherapy    | 387             | .57                 | .02                   |
| Age ≤40                  | 34              | reference           |                       |
| Age (41-50)              | 218             | .39                 | .02                   |
| Age (51-60)              | 356             | .28                 | .001                  |
| Age (61-70)              | 287             | .40                 | .02                   |
| Age >70                  | 59              | .23                 | .02                   |
| Race White               | 760             | reference           |                       |
| Race Black               | 83              | .90                 | .75                   |
| Race Asian               | 49              | .95                 | .90                   |
| Race Other/Unknown       | 62              | .87                 | .77                   |
| RS 0-10                  | 178             | reference           |                       |
| RS 11-25                 | 667             | .93                 | .78                   |
| RS >25                   | 109             | 1.11                | .81                   |
| Private Insurance        | 555             | reference           |                       |
| Medicare                 | 133             | 1.19                | .59                   |
| Medicaid                 | 74              | 1.56                | .15                   |
| Military                 | 14              | .65                 | .67                   |
| None                     | 49              | 1.24                | .61                   |
| International Enrollment | 121             | .62                 | .22                   |
| Other Insurance          | 8               | 1.06                | .95                   |

**eTable 3.** Endocrine Therapy Early Discontinuation by Medication Status, Adjusted for Age and Chemotherapy

| <b>Non-Endocrine Therapy Medications</b> | <b><i>n</i></b> | <b>Hazard Ratio</b> | <b>95% Confidence Interval</b> | <b><i>P</i>-value</b> |
|------------------------------------------|-----------------|---------------------|--------------------------------|-----------------------|
| No Prescription Meds                     | 219             | reference           |                                | .26                   |
| 1-3 Prescription Meds                    | 429             | 1.01                | (0.60, 1.68)                   |                       |
| 4-7 Prescription Meds                    | 218             | 1.54                | (0.89, 2.65)                   |                       |
| >7 Prescription Meds                     | 78              | 1.02                | (0.46, 2.30)                   |                       |
| No Metformin Agents                      | 843             | reference           |                                | .62                   |
| Metformin Agents                         | 84              | 0.83                | (0.40, 1.71)                   |                       |
| No Insulin                               | 904             | reference           |                                | .58                   |
| Insulin                                  | 21              | 1.38                | (0.44, 4.37)                   |                       |
| No Opioids                               | 815             | reference           |                                | .40                   |
| Opioids                                  | 111             | 1.27                | (0.73, 2.19)                   |                       |
| No Anxiolytics/Sedatives                 | 824             | reference           |                                | .56                   |
| Anxiolytics/Sedatives                    | 101             | 1.19                | (0.66, 2.12)                   |                       |
| No Antiplatelet                          | 796             | reference           |                                | .92                   |
| Antiplatelet                             | 132             | 1.03                | (0.59, 1.78)                   |                       |
| No NSAIDS                                | 797             | reference           |                                | .98                   |
| NSAIDS                                   | 124             | 1.01                | (0.57, 1.77)                   |                       |
| No COX-2 Inhibitor                       | 912             | reference           |                                | .52                   |
| COX-2 Inhibitor                          | 12              | 1.59                | (0.39, 6.43)                   |                       |
| No Antidepression Meds                   | 745             | reference           |                                | .003                  |
| Any Antidepression Meds                  | 184             | 1.87                | (1.23, 2.84)                   |                       |
| No Prescription Hot Flash Meds           | 914             | reference           |                                | .90                   |
| Prescription Hot Flash Meds              | 10              | 0.88                | (0.12, 6.30)                   |                       |
| No Non-Prescription Hot Flash Meds       | 904             | reference           |                                | .05                   |
| Non-Prescription Hot Flash Meds          | 20              | 2.42                | (0.99, 5.95)                   |                       |
| No Bisphosphonates                       | 865             | reference           |                                | .44                   |
| Bisphosphonates                          | 61              | 0.7                 | (0.29, 1.72)                   |                       |

**eFigure 1. CONSORT Diagram**

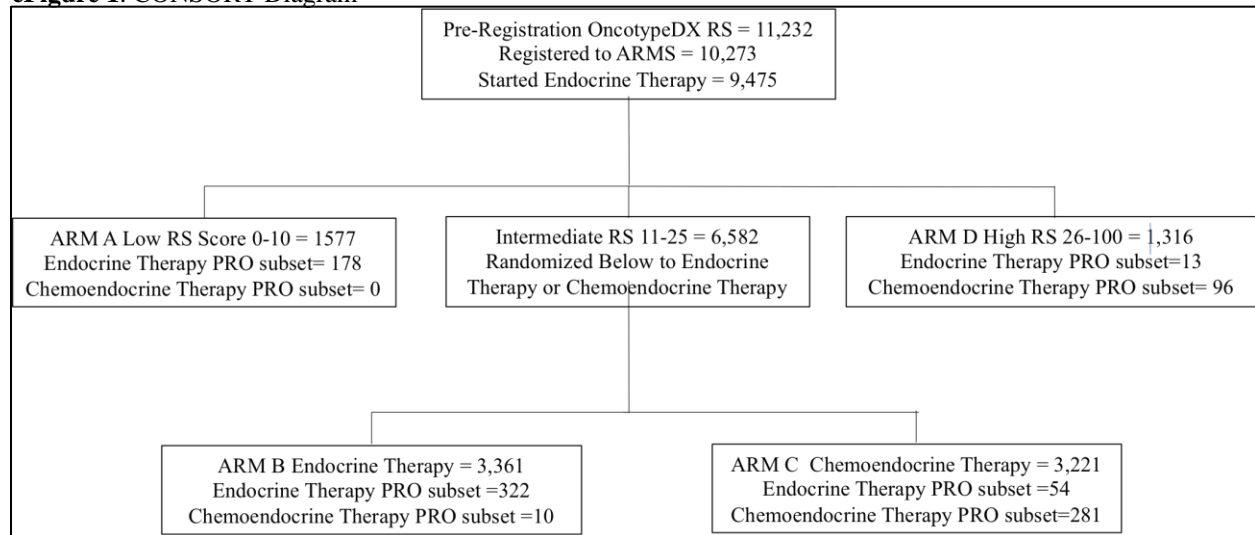

**eFigure 2.** Kaplan-Meier Curve

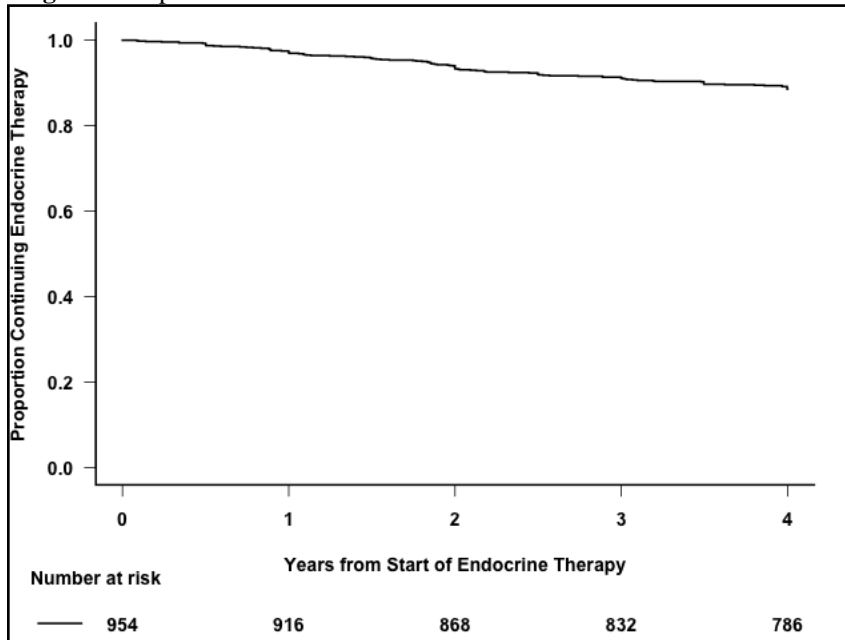

Proportion of breast cancer patients continuing endocrine therapy across time.
